# Supplementary material for: Psychological Symptoms and Quality of Life After Simultaneous Kidney and Pancreas Transplantation
Source: PubMed Central journal article supplement — Transplant Direct. 2020 Apr 27;6(5):e552. doi: 10.1097/TXD.0000000000000996 (PMC7213608; doi:10.1097/txd.0000000000000996), 2020-04-27
Supplement: txd-6-e552-s001.pdf [file txd-6-e552-s001.pdf]

Table S1. Subgroup analyses of post SPK patients based on time after transplantation.

|                                                                  | Post-SPK < 7 years | Post-SPK ≥ 7 years     | P-value <sup>6</sup> |
|------------------------------------------------------------------|--------------------|------------------------|----------------------|
| <b>n</b>                                                         | 35                 | 37                     |                      |
| <b>Age (yrs)</b>                                                 | 45.2±6.7           | 50.6±8.8               | 0.005                |
| <b>Male gender</b>                                               | 19 (54%)           | 22 (59%)               | 0.67                 |
| <b>Married/living together<sup>1</sup></b>                       | 29 (83%)           | 27 (73%)               | 0.42                 |
| <b>Ethnicity (Non-Caucasian)</b>                                 | 2 (6%)             | 5 (14%)                | 0.26                 |
| <b>Age of diagnosis DM (yrs)</b>                                 | 12.3±5.3           | 12.5±8.0               | 0.86                 |
| <b>Duration of DM<sup>2</sup> (yrs)</b>                          | 29.6±6.9           | 27.9±8.4               | 0.37                 |
| <b>Insulin use</b>                                               | 4 (11%)            | 0 (0%)                 | 0.034                |
| <b>Dialysis</b>                                                  | 1 (3%)             | 0 (0%)                 | 0.49                 |
| <b>Retinopathy<sup>3</sup></b>                                   | 33 (94%)           | 37 (100%)              | 0.14                 |
| <b>Arterial vascular disease<sup>4</sup></b>                     | 9 (26%)            | 19 (51%)               | 0.026                |
| <b>Amputation<sup>5</sup></b>                                    | 6 (17%)            | 7 (19%)                | 0.85                 |
| <b>Malignancy</b><br>-Nonmelanoma skin cancer<br>- Other cancers | 0 (0%)<br>1 (2.9%) | 7 (18.9%)<br>4 (10.8%) | 0.007                |
| <b>SF-36 'General Health'</b>                                    | 49.0±22.3          | 45.5±24.1              | 0.53                 |
| <b>SF-36 'Physical Function'</b>                                 | 73.1±27.2          | 59.5±32.1              | 0.05                 |
| <b>BSI total score</b>                                           | 0.54±0.54          | 0.55±0.57              | 0.9                  |

SPK = simultaneous pancreas kidney. Values are reported as number (% of total in parentheses) for categorical data and mean±SD for quantitative data, unless otherwise indicated. Seven years was the median time after transplantation in the post SPK group. <sup>1</sup>Married or living together. <sup>2</sup>Time from diagnosis type 1 DM to pancreas transplant. <sup>3</sup>Retinopathy that required laser coagulation; <sup>4</sup>Arterial vascular disease (coronary, cerebral, peripheral) requiring either hospital admission or treatment; <sup>5</sup> Amputation indicates amputations performed on the lower extremity. <sup>6</sup>P-values by independent T-test or Chi-square tests

Table S2. Psychological symptoms subscales (BSI).

|                                      | <b>Post-SPK</b> | <b>Pre-SPK</b> | <b>P-value<br/>post<br/>SPK vs pre<br/>SPK</b> | <b>T1D<br/>reference</b> | <b>Dutch<br/>population<br/>reference<br/>(18)</b> |
|--------------------------------------|-----------------|----------------|------------------------------------------------|--------------------------|----------------------------------------------------|
| <b>Somatization</b>                  | 0.68±0.66       | 0.61±0.55      | 0.55                                           | 0.37±0.48                | 0.17±0.28                                          |
| <b>Obsessive-<br/>compulsive</b>     | 0.79±0.84       | 0.54±0.59      | 0.08                                           | 0.55±0.60                | 0.35±0.42                                          |
| <b>Interpersonal<br/>Sensitivity</b> | 0.56±0.72       | 0.45±0.50      | 0.36                                           | 0.37±0.51                | 0.29±0.42                                          |
| <b>Depression</b>                    | 0.58±0.69       | 0.48±0.65      | 0.43                                           | 0.38±0.48                | 0.20±0.34                                          |
| <b>Anxiety</b>                       | 0.50±0.75       | 0.34±0.44      | 0.19                                           | 0.27±0.45                | 0.22±0.34                                          |
| <b>Hostility</b>                     | 0.46±0.47       | 0.38±0.46      | 0.36                                           | 0.21±0.25                | 0.20±0.29                                          |
| <b>Phobic Anxiety</b>                | 0.37±0.56       | 0.27±0.48      | 0.32                                           | 0.21±0.32                | 0.11±0.23                                          |
| <b>Paranoid Ideation</b>             | 0.43±0.61       | 0.45±0.54      | 0.86                                           | 0.21±0.30                | 0.23±0.35                                          |
| <b>Psychoticism</b>                  | 0.34±0.54       | 0.31±0.44      | 0.75                                           | 0.25±0.33                | 0.14±0.28                                          |
| <b>BSI total score</b>               | 0.54±0.55       | 0.45±0.42      | 0.34                                           | 0.32±0.33                | 0.21±0.25                                          |

SPK = simultaneous pancreas kidney. T1D = Type 1 diabetes reference group. Values are reported as mean±SD. Higher values indicate more psychological symptoms

Table S3. Quality of Life subscales (SF-36).

|                                 | <b>Post-SPK</b> | <b>Pre-SPK</b> | <b>P-value post<br/>SPK vs pre SPK</b> | <b>T1D reference</b> |
|---------------------------------|-----------------|----------------|----------------------------------------|----------------------|
| <b>Physical function</b>        | 66.1±30.4       | 64.3±27.3      | 0.34                                   | 88.5±16.5            |
| <b>Social function</b>          | 67.4±29.5       | 66.8±26.5      | 0.91                                   | 82.7±17.7            |
| <b>Role physical</b>            | 45.8±42.4       | 37.2±35.7      | 0.25                                   | 72.0±41.0            |
| <b>Role emotional</b>           | 76.8±37.8       | 66.7±39.3      | 0.16                                   | 84.9±28.7            |
| <b>Mental health</b>            | 75.5±19.7       | 75.1±16.5      | 0.91                                   | 79.1±12.7            |
| <b>Vitality</b>                 | 57.3±21.1       | 52.4±21.0      | 0.22                                   | 66.0±18.4            |
| <b>Bodily pain</b>              | 71.0±28.5       | 72.9±28.1      | 0.72                                   | 85.4±17.2            |
| <b>General health</b>           | 47.2±23.1       | 37.5±18.1      | 0.017                                  | 60.6±22.3            |
| <b>Sum Physical<sup>1</sup></b> | 240.2±101.6     | 226.9±91.9     | 0.47                                   | 311.9±75.4           |
| <b>Sum Mental<sup>2</sup></b>   | 219.7±68.7      | 208.6±65.4     | 0.38                                   | 264.9±48.6           |
| <b>Total score</b>              | 507.1±159.8     | 473.0±142.0    | 0.24                                   | 637.4±124.7          |

SPK = simultaneous pancreas kidney. T1D = Type 1 diabetes reference group. Values are reported as mean±SD. <sup>1</sup>Sum score of the following subscales: Bodily pain, Vitality, Physical Function, Role Physical. <sup>2</sup>Sum score of the following subscales: Mental Health, Social Function, Role Emotional. Higher scores indicate better quality of life.

Table S4. Personality trait subscales (DAPP-sf) .

|                              | <b>Post-SPK</b> | <b>Pre-SPK</b> | <b>P-value post SPK vs pre SPK</b> | <b>T1D reference</b> | <b>Dutch population reference<sup>(18)</sup></b> |
|------------------------------|-----------------|----------------|------------------------------------|----------------------|--------------------------------------------------|
| <b>Submissiveness</b>        | 1.8±0.75        | 1.8±0.67       | 1.0                                | 2.2±0.79             | 2.1±0.75                                         |
| <b>Cognitive Distortion</b>  | 1.4±0.61        | 1.4±0.55       | 1.0                                | 1.5±0.45             | 1.4±0.51                                         |
| <b>Identity Problems</b>     | 1.8±0.79        | 1.7±0.73       | 0.49                               | 1.7±0.76             | 1.5±0.59                                         |
| <b>Affective Lability</b>    | 2.3±0.84        | 2.1±0.85       | 0.21                               | 2.0±0.73             | 2.0±0.76                                         |
| <b>Stimulus Seeking</b>      | 2.0±0.84        | 2.0±0.76       | 1.0                                | 1.8±0.54             | 2.0±0.72                                         |
| <b>Compulsivity</b>          | 2.6±0.95        | 2.6±1.1        | 1.0                                | 2.7±0.78             | 2.5±0.77                                         |
| <b>Restricted Expression</b> | 2.5±0.74        | 2.5±0.76       | 1.0                                | 2.4±0.66             | 2.3±0.75                                         |
| <b>Oppositionality</b>       | 1.7±0.50        | 1.7±0.57       | 1.0                                | 1.7±0.44             | 1.9±0.65                                         |
| <b>Callousness</b>           | 2.0±0.80        | 2.1±0.63       | 0.47                               | 1.9±0.65             | 1.7±0.50                                         |
| <b>Intimacy Problems</b>     | 2.3±0.82        | 2.4±0.80       | 0.51                               | 2.4±0.77             | 2.1±0.67                                         |
| <b>Rejection</b>             | 2.3±0.69        | 2.4±0.90       | 0.50                               | 2.3±0.60             | 2.5 ±0.76                                        |
| <b>Anxiousness</b>           | 2.0±0.84        | 1.9±0.80       | 0.52                               | 2.1±0.78             | 2.0±0.81                                         |
| <b>Conduct Problems</b>      | 1.2±0.36        | 1.3±0.36       | 0.14                               | 1.2±0.22             | 1.3±0.37                                         |
| <b>Suspiciousness</b>        | 1.5±0.56        | 1.5±0.67       | 1.0                                | 1.3±0.56             | 1.3±0.46                                         |
| <b>Social Avoidance</b>      | 1.8±0.80        | 1.7±0.56       | 0.46                               | 1.8±0.72             | 1.8±0.73                                         |
| <b>Narcissism</b>            | 1.7±0.63        | 1.8±0.77       | 0.44                               | 1.9±0.64             | 2.2±0.76                                         |
| <b>Insecure Attachment</b>   | 2.0±0.97        | 2.0±1.0        | 1.0                                | 1.9±0.90             | 1.7±0.77                                         |
| <b>Self-Harm</b>             | 1.2±0.49        | 1.1±0.40       | 0.25                               | 1.1±0.25             | 1.1±0.27                                         |

Values are reported as mean±SD. Higher values indicate an increase in the personality trait

Data S1: Additional models.

**Physical subscales correlation outcome**

SF-36 (physical sum score) = 481 – 79\*(BSI total score) – 51\*(dialysis) - 58\* (retinopathy) – 46\*(vascular event) – 48 \*(malignancy(1)) – 89\*(malignancy(2)) – 29\*(if female) -1.5 \*(age)

**BSI total score correlation outcome**

BSI total score = 0.14 + 0.28\*(retinopathy) + 0.15\*(male gender) + 0.27 \* (non-caucasian ethnicity) – 0.36\*(if low level of education)
